# Supplementary material for: Enhanced multi-phonon Raman scattering and nonlinear optical power limiting in ZnO:Au nanostructures
Source: Royal Society of Chemistry journal article supplement (doi:10.1039/c4ra11204k), 2015-01-01
Supplement: c4ra11204k1.pdf [file c4ra11204k1.pdf]

## Enhanced multi-phonon Raman scattering and nonlinear optical power limiting in ZnO:Au nanostructures

*R. Udayabhaskar<sup>1</sup>, B. Karthikeyan<sup>1\*</sup>, P. Sreekanth<sup>2</sup>, Reji Philip<sup>2</sup>*

<sup>1</sup>Department of Physics, National Institute of Technology, Tiruchirappalli 620 015, India

<sup>2</sup>Ultrafast and Nonlinear Optics Lab, Light and Matter Physics Group, Raman Research Institute,  
Bangalore 560080, India

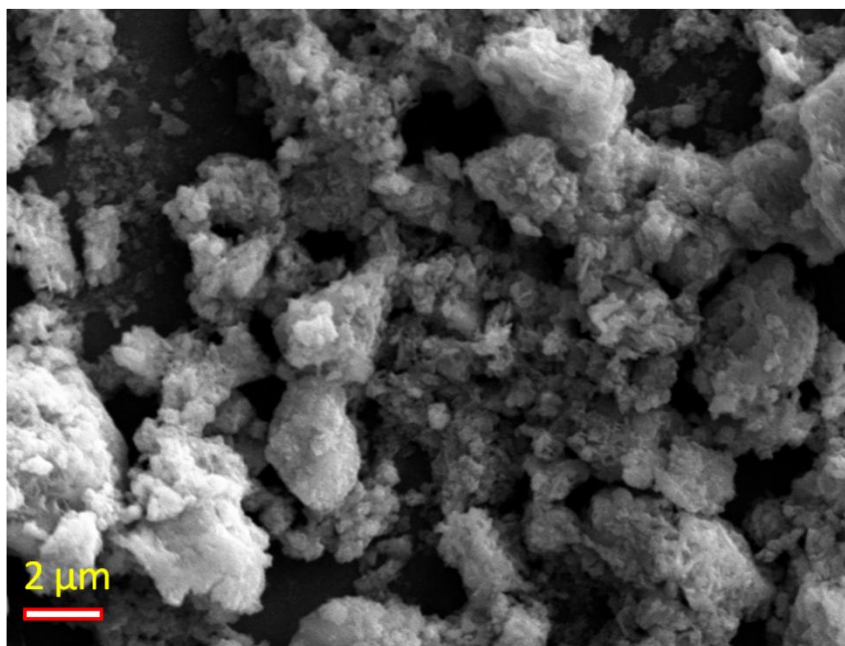

**Figure ES1:** SEM image of pure ZnO (without gold content). Figure depicts the irregular, agglomerated morphology.

---

\* Corresponding Author.: Email: balkarin@yahoo.com (B. Karthikeyan), Phone: 0431-2503612; FAX: : +91-(0) 0431-2500133; reji@rri.res.in (Reji Philip)

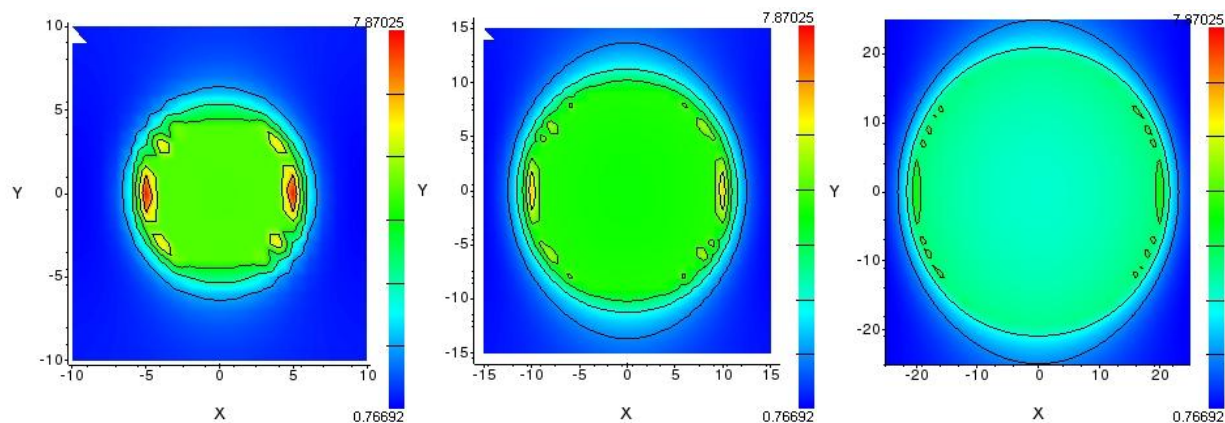

**Figure ES2:** Electric field  $|E_{out}|^2$  outside gold nanospheres of radius 5, 10 and 20 nm respectively, in a medium with refractive index of 2.0034 (ZnO).

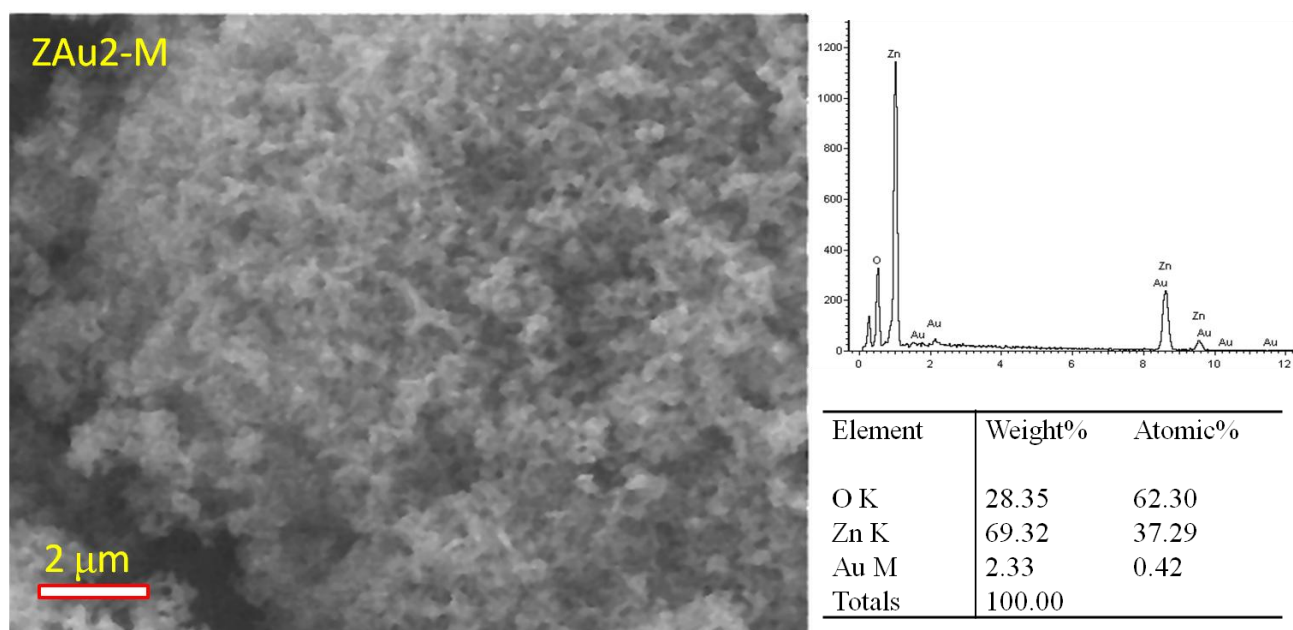

**Figure ES3:** SEM image of the ZAu2-M sample exhibits spherical granules in an agglomerated form. EDX analysis confirms the presence of Au along with Zn and O in the samples.

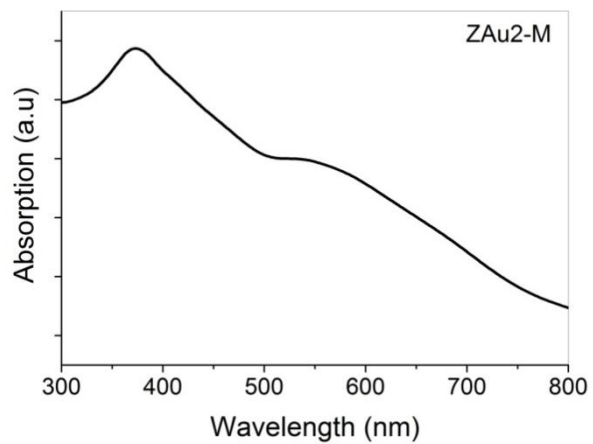

**Figure ES4:** Optical absorption spectrum of ZAu2-M sample.

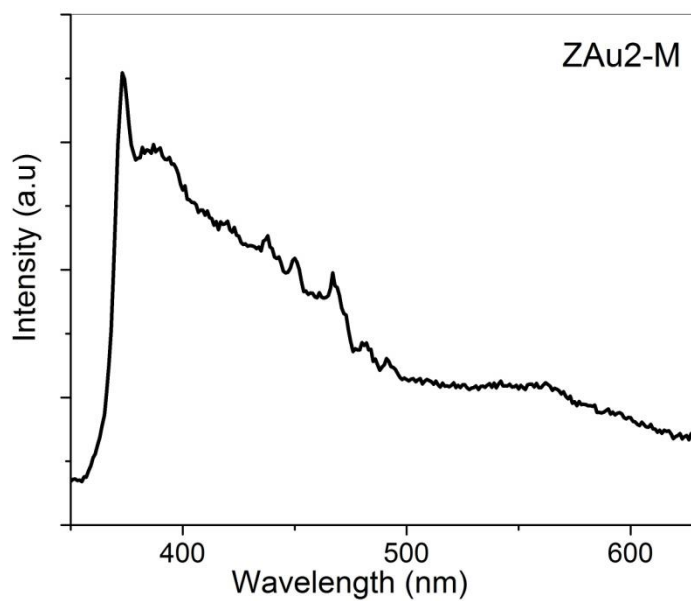

**Figure ES5:** Photoluminescence spectrum of ZAu2-M sample.

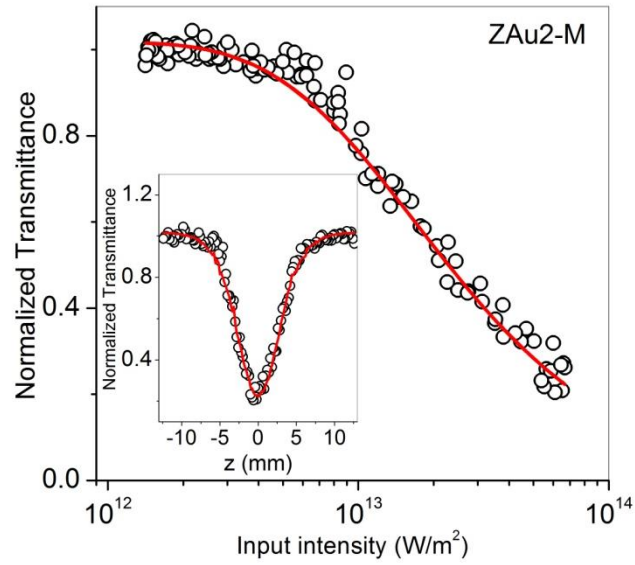

**Figure ES6:** Intensity dependent optical transmission of ZAu2-M sample calculated from the open aperture Z-scan curves of the samples (given in inset) measured using 532 nm, 5 ns laser pulses (incident laser energy of  $150 \mu J$ ). Circles are data points while solid lines are numerical fits.
